# Supplementary material
Source: MDPI journal article supplement (https://www.mdpi.com/2071-1050/10/4/914)
Supplement: s1 [file s1]

## Supplementary material, results literature review

### Results literature review

For the purpose of this study, a literature review is carried out to identify the knowledge on the different perspectives and their interactions and how they are related to current debates on water quality. The challenges to realising water quality improvement in river basins is not limited to the European continent, but can be recognized worldwide. The range of the literature review, therefore, was wide, in order to gather studies of experiences from a variety of ecological, legal and social-economic circumstances. The review was carried out using the search engines Google Scholar, Scopus, Web of Science and Science Direct on the terms 'water quality' and 'governance' excluding studies focusing on water quantity, water supply, water reuse or sea basins. An earlier review of WFD Implementation made by Boeuf and Fritsch [1] was also used, as well as legal literature based upon EC publications, case law from the European Court of Justice (ECJ) and follow ups of references in the articles studied.

This resulted in a list of 122 articles, each of which uses one or more perspectives, implicitly or explicitly. Based upon the abstract, title and key words, an initial identification was made as to which of the perspectives were used in the article. If there was uncertainty regarding this observation, the article was read and the qualification adjusted accordingly. Articles using two or more perspectives were used to describe the interactions and their contribution to water quality.

One of the restrictions of this approach is that grey literature is only included on a limited basis; another is that the search focused on English-language publications only. These limitations set constraints on the results, especially with regard to legal and ecological studies, as these are often nation based, written in the national language and they are not found by search engines such as Scopus. Despite these limitations, the resulting list of papers does offer a wide overview of how scientific literature addresses the ecological, legal and social-economic perspectives on water quality governance and their interactions so far.

Table 1 shows the results of the literature review.

Table 1 Results literature review on ecological, legal and social perspectives on water quality management.

| No. | Reference                     | Countries or continents studied | Perspectives |       |        |
|-----|-------------------------------|---------------------------------|--------------|-------|--------|
|     |                               |                                 | Ecological   | Legal | Social |
| 1   | Andersson, <i>et al.</i> [2]  | Sweden                          | -            | -     | X      |
| 2   | Baaner [3]                    | Denmark, Sweden, Norway         | X            | X     | -      |
| 3   | Backes and Van Rijswick [4]   | Europe                          | -            | X     | -      |
| 4   | Behagel and Arts [5]          | Netherlands                     | -            | -     | X      |
| 5   | Behagel and Turnhout [6]      | Netherlands                     | -            | -     | X      |
| 6   | Benson, <i>et al.</i> [7]     | England, Wales (UK)             | -            | X     | X      |
| 7   | Blackstock, <i>et al.</i> [8] | Scotland (UK)                   | X            | -     | X      |
| 8   | Blackstock, <i>et al.</i> [9] | Scotland (UK)                   | -            | -     | X      |
| 9   | Borowski, <i>et al.</i> [10]  | Germany, France                 | -            | -     | X      |

| No. | Reference                       | Countries or continents studied | Perspectives |       |        |
|-----|---------------------------------|---------------------------------|--------------|-------|--------|
|     |                                 |                                 | Ecological   | Legal | Social |
| 10  | Braioni, <i>et al.</i> [11]     | Italy                           | X            | -     | X      |
| 11  | Bremer, <i>et al.</i> [12]      | Latin America                   | -            | -     | X      |
| 12  | Brils, <i>et al.</i> [13]       | Europe                          | X            | -     | X      |
| 13  | Carpenter, <i>et al.</i> [14]   | USA                             | X            | -     | X      |
| 14  | Chang, <i>et al.</i> [15]       | USA                             | X            | -     | X      |
| 15  | Chen, <i>et al.</i> [16]        | China                           | X            | -     | X      |
| 16  | Chiang, <i>et al.</i> [17]      | Chile                           | X            | X     | -      |
| 17  | Comito, <i>et al.</i> [18]      | USA                             | -            | -     | X      |
| 18  | Cook [19]                       | Canada                          | X            | X     | -      |
| 19  | Crabbé [20]                     | Belgium                         | -            | X     | X      |
| 20  | Crabtree, <i>et al.</i> [21]    | United Kingdom                  | -            | -     | X      |
| 21  | Da Silva, <i>et al.</i> [22]    | Portugal                        | X            | -     | X      |
| 22  | deLeon [23]                     | No specific country             | -            | -     | X      |
| 23  | Dieperink, <i>et al.</i> [24]   | Netherlands                     | -            | X     | X      |
| 24  | Drazkiewicz, <i>et al.</i> [25] | Germany                         | -            | -     | X      |
| 25  | Duncan [26]                     | New Zealand                     | -            | -     | X      |
| 26  | EC [27]                         | Europe                          | -            | X     | -      |
| 27  | ECJ [28]                        | Europe vs. France               | -            | X     | -      |
| 28  | ECJ [29]                        | Europe vs. Germany              | -            | X     | -      |
| 29  | ECJ [30]                        | Europe vs. Germany              | -            | X     | -      |
| 30  | Elofsson [31]                   | No specific country             | -            | -     | X      |
| 31  | Freriks, <i>et al.</i> [32]     | Netherlands                     | -            | X     | X      |
| 32  | Gani and Scrimgeour [33]        | OECD countries                  | X            | X     | -      |
| 33  | Grant (2000) [34]               | Europe                          | X            | X     | -      |
| 34  | Gu, <i>et al.</i> [35]          | China                           | -            | -     | X      |
| 35  | Guo, <i>et al.</i> [36]         | China                           | X            | -     | X      |
| 36  | Hagemann, <i>et al.</i> [37]    | Ukraine                         | X            | X     | X      |
| 37  | Hammer, <i>et al.</i> [38]      | Sweden                          | X            | -     | X      |
| 38  | Harmsworth, <i>et al.</i> [39]  | New Zealand                     | -            | -     | X      |
| 39  | Hering, <i>et al.</i> [40]      | Europe                          | X            | -     | -      |
| 40  | Hong and Chung [41]             | South Korea                     | -            | -     | X      |
| 41  | Howarth [42]                    | Europe                          | -            | X     | X      |
| 42  | Huber-Stearns and Cheng [43]    | USA                             | -            | X     | X      |
| 43  | Hüesker and Moss [44]           | Germany                         | -            | -     | X      |
| 44  | Huitema, <i>et al.</i> [45]     | No specific country             | X            | -     | X      |
| 45  | Hummel, <i>et al.</i> [46]      | No specific country             | -            | -     | X      |
| 46  | Jin, <i>et al.</i> [47]         | China                           | X            | X     | X      |
| 47  | Jonsson [48]                    | Sweden                          | -            | -     | X      |
| 48  | Kastens and Newig [49]          | Germany                         | -            | -     | X      |
| 49  | Kastens and Newig [50]          | Germany                         | -            | -     | X      |
| 50  | Keessen, <i>et al.</i> [51]     | 11 EU countries                 | X            | X     | -      |
| 51  | Knieper and Pahl-Wostl [52]     | Europe                          | X            | X     | X      |
| 52  | Kochskämper, <i>et al.</i> [53] | Germany, Spain, UK              | -            | -     | X      |
| 53  | Kolinjivadi, <i>et al.</i> [54] | No specific country             | -            | -     | X      |
| 54  | Kotze and Silima [55]           | South Africa                    | X            | -     | X      |

| No. | Reference                       | Countries or continents studied | Perspectives |       |        |
|-----|---------------------------------|---------------------------------|--------------|-------|--------|
|     |                                 |                                 | Ecological   | Legal | Social |
| 55  | Lah, <i>et al.</i> [56]         | South Korea                     | X            | -     | X      |
| 56  | Le Bourhis [57]                 | France                          | X            | -     | X      |
| 57  | Lee [58]                        | Europe                          | -            | X     | X      |
| 58  | Leidel, <i>et al.</i> [59]      | Ukraine                         | X            | -     | X      |
| 59  | Lukacs, <i>et al.</i> [60]      | USA                             | -            | -     | X      |
| 60  | Mauerhofer, <i>et al.</i> [61]  | No specific country             | -            | X     | X      |
| 61  | McLaughlin and Krantzberg [62]  | Canada, USA                     | -            | -     | X      |
| 62  | Metcalf, <i>et al.</i> [63]     | Australia                       | X            | -     | X      |
| 63  | Metz and Ingold [64]            | Switzerland                     | -            | -     | X      |
| 64  | Mihók, <i>et al.</i> [65]       | Hungary                         | X            | X     | X      |
| 65  | Moss [66]                       | Europe                          | X            | -     | X      |
| 66  | Newig and Koontz [67]           | Europe                          | -            | -     | X      |
| 67  | Newig and Fritsch [68]          |                                 | X            | -     | X      |
| 68  | Newig, <i>et al.</i> [69]       |                                 | -            | -     | X      |
| 69  | Newson [70]                     | United Kingdom                  | -            | -     | X      |
| 70  | Norman, <i>et al.</i> [71]      | Mexico                          | X            | -     | -      |
| 71  | Ostrom, <i>et al.</i> [72]      | No specific country             | -            | -     | X      |
| 72  | Pahl-Wostl, <i>et al.</i> [73]  | 29 Basins worldwide             | X            | -     | X      |
| 73  | Pahl-Wostl, <i>et al.</i> [74]  | No specific country             | X            | -     | X      |
| 74  | Parker [75]                     | USA                             | X            | -     | X      |
| 75  | Parsons, <i>et al.</i> [76]     | Australia                       | X            | -     | -      |
| 76  | Pereira and Quintana [77]       | Europe                          | -            | -     | X      |
| 77  | Plambeck [78]                   | Europe                          | -            | X     | X      |
| 78  | Plant, <i>et al.</i> [79]       | Australia                       | X            | -     | X      |
| 79  | Probohudono, <i>et al.</i> [80] | Indonesia                       | -            | -     | X      |
| 80  | Raad van State [81]             | Netherlands                     | -            | X     | -      |
| 81  | Raadgever, <i>et al.</i> [82]   | Netherlands                     | -            | -     | X      |
| 82  | Rahaman, <i>et al.</i> [83]     | Europe                          | -            | -     | X      |
| 83  | Reeling and Gramig [84]         | USA                             | X            | -     | X      |
| 84  | Reinhard, <i>et al.</i> [85]    | Europe                          | X            | -     | X      |
| 85  | Richter, <i>et al.</i> [86]     | Germany                         | X            | X     | X      |
| 86  | Rissman, <i>et al.</i> [87]     | USA                             | -            | -     | X      |
| 87  | Roggero [88]                    | Germany                         | -            | -     | X      |
| 88  | Ross and Connell [89]           | Australia                       | -            | X     | X      |
| 89  | Rutt and Bluwstein [90]         | USA                             | -            | X     | X      |
| 90  | Schindler [91]                  | USA                             | X            | -     | X      |
| 91  | Schmidt, <i>et al.</i> [92]     | China                           | X            | -     | -      |
| 92  | Scholz and Stiffler [93]        | USA                             | -            | X     | X      |
| 93  | Scott [94]                      | USA                             | X            | -     | X      |
| 94  | Scott [95]                      | USA                             | X            | -     | X      |
| 95  | Scott and Trubek [96]           | Europe                          | -            | X     | X      |
| 96  | Smith and Porter [97]           | USA                             | X            | X     | X      |
| 97  | Somanathan [98]                 | South East Asia                 | -            | -     | X      |
| 98  | Steiger-Meister and Becker [99] | USA                             | -            | X     | X      |

| No. | Reference                               | Countries or continents studied        | Perspectives |       |        |
|-----|-----------------------------------------|----------------------------------------|--------------|-------|--------|
|     |                                         |                                        | Ecological   | Legal | Social |
| 99  | Storey, <i>et al.</i> [100]             | New Zealand                            | -            | -     | X      |
| 100 | Stuart and Gillon [101]                 | USA                                    | -            | -     | X      |
| 101 | Tan [102]                               | OECD countries                         | X            | -     | X      |
| 102 | Taylor and Short [103]                  | USA                                    | X            | -     | X      |
| 103 | Trowbridge, <i>et al.</i> [104]         | USA                                    | X            | -     | X      |
| 104 | Van der Heijden and Ten Heuvelhof [105] | Netherlands                            | -            | -     | X      |
| 105 | Van der Heijden, <i>et al.</i> [106]    | Netherlands                            | -            | -     | X      |
| 106 | Van Holten and Van Rijswijk [107]       | Europe                                 | -            | X     | -      |
| 107 | Van Kempen [108]                        | Europe                                 | -            | X     | -      |
| 108 | van Leeuwen and Sjerps [109]            | Turkey                                 | -            | -     | X      |
| 109 | van Meerkerk, <i>et al.</i> [110]       | Netherlands                            | -            | -     | X      |
| 110 | Van Rijswijk [111]                      | Germany                                | -            | X     | -      |
| 111 | Van Rijswijk, <i>et al.</i> [112]       | Europe, 3 basins: Rhine, Meuse, Danube | -            | X     | -      |
| 112 | Van Rijswijk [113]                      | Netherlands                            | -            | X     | -      |
| 113 | Vollmer-Sanders, <i>et al.</i> [114]    | Canada, USA                            | X            | -     | X      |
| 114 | Vörösmarty, <i>et al.</i> [115]         | No specific country                    | X            | -     | X      |
| 115 | Wang and Ongley [116]                   | China                                  | -            | X     | X      |
| 116 | Wardropper, <i>et al.</i> [117]         | USA                                    | X            | X     | X      |
| 117 | Waylen, <i>et al.</i> [118]             | Scotland (UK)                          | -            | X     | X      |
| 118 | Webb and Martin [119]                   | Australia                              | X            | X     | X      |
| 119 | Weible and Sabatier [120]               | USA                                    | X            | -     | X      |
| 120 | Wright, <i>et al.</i> [121]             | Australia                              | -            | X     | X      |
| 121 | Yates, <i>et al.</i> [122]              | Canada                                 | X            | -     | X      |
| 122 | Zingraff-Hamed, <i>et al.</i> [123]     | France, Germany                        | -            | -     | X      |

## References

1. Boeuf, B.; Fritsch, O. Studying the implementation of the Water Framework Directive in Europe: A meta-analysis of 89 journal articles. *Ecology and Society* **2016**, *21*, 19.
2. Andersson, I.; Petersson, M.; Jarsjö, J. Impact of the European Water Framework Directive on local-level water management: Case study Oxunda Catchment, Sweden. *Land Use Policy* **2012**, *29*, 73-82.
3. Baaner, L. Programmes of measures under the Water Framework Directive – a comparative case study. *Nordic Environmental Law Journal* **2011**, *1*, 22.
4. Backes, Ch.W.; Van Rijswijk, H.F.M.W. Effective environmental protection: Towards a better understanding of environmental quality standards in environmental legislation. In *Miljörättsliga perspektiv och tankevändor*, Zetterberg, L.G.C., Ed. Vänbok till Jan Darpo & Gabriel Michanek: Uppsala: Iustus Förlag AB, 2013; pp 19-50.
5. Behagel, J.; Arts, B. Democratic governance and political rationalities in the implementation of the water framework directive in the Netherlands. *Public Administration* **2014**, *92*, 16.
6. Behagel, J.; Turnhout, E. Democratic legitimacy in the implementation of the Water Framework Directive in the Netherlands: Towards participatory and deliberative norms? *Journal of Environmental Policy & Planning* **2011**, *13*, 20.

7. Benson, D.; Fritsch, O.; Cook, H.; Schmid, M. Evaluating participation in WFD river basin management in England and Wales: Processes, communities, outputs and outcomes *Land Use Policy* **2014**, *38*, 10.
8. Blackstock, K.L.; Waylen, K.A.; Dunglinson, J.; Marshall, K.M. Linking process to outcomes – internal and external criteria for a stakeholder involvement in river basin management planning. *Ecological Economics* **2012**, *77*, 10.
9. Blackstock, K.L.; Waylen, K.A.; Marshall, K.M.; Dunglinson, J. Hybridity of representation: Insights from river basin management planning in Scotland. *Environment and Planning C: Government and Policy* **2014**, *32*, 18.
10. Borowski, I.; Le Bourhis, J.P.; Pahl-Wostl, C.; Barraqué, B. Spatial misfit in participatory river basin management: Effects on social learning, a comparative analysis of German and French case studies. *Ecology and Society* **2008**, *13*, 7.
11. Braioni, M.G.; Braioni, A.; Locascio, A.; Salmoiraghi, G. Some operational advice for reducing hydraulic risk and for protecting biodiversity and the landscape in riparian areas – river corridor. *Ecohydrology and Hydrobiology* **2017**, *17*, 4-17.
12. Bremer, L.L.; Auerbach, D.A.; Goldstein, J.H.; Vogl, A.L.; Shemie, D.; Kroeger, T.; Nelson, J.L.; Benítez, S.P.; Calvache, A.; Guimarães, J., *et al.* One size does not fit all: Natural infrastructure investments within the Latin American Water Funds Partnership. *Ecosystem Services* **2016**, *17*, 217-236.
13. Brils, J.; Harris, B.; Barceló, D.; Blum, W.; Brack, W.; Müller-Grabherr, D.; Négrel, P.; Ragnarsdottir, V.; Salomons, W.; Slob, A., *et al.* Synthesis and recommendations towards risk-informed river basin management. In *Handbook of Environmental Chemistry*, Springer Verlag: 2014; Vol. 29, pp 367-390.
14. Carpenter, S.R.; Booth, E.G.; Gillon, S.; Kucharik, C.J.; Loheide, S.; Mase, A.S.; Motew, M.; Qiu, J.; Rissman, A.R.; Seifert, J., *et al.* Plausible futures of a social-ecological system: Yahara Watershed, Wisconsin, USA. *Ecology and Society* **2015**, *20*.
15. Chang, H.; Thiers, P.; Netusil, N.R.; Yeakley, J.A.; Rollwagen-Bollens, G.; Bollens, S.M.; Singh, S. Relationships between environmental governance and water quality in a growing metropolitan area of the Pacific Northwest, USA. *Hydrology and Earth System Sciences* **2014**, *18*, 1383-1395.
16. Chen, M.; Wei, X.; Huang, H.; Lü, T. Poyang Lake Basin: A successful, large-scale integrated basin management model for developing countries. *Water Science and Technology* **2011**, *63*, 1899-1905.
17. Chiang, G.; Munkittrick, K.R.; McMaster, M.E.; Barra, R.; Servos, M. Regional cumulative effects monitoring framework: Gaps and challenges for the Biobío river basin in south central Chile. *Gayana* **2014**, *78*, 109-119.
18. Comito, J.; Wolseth, J.; Morton, L. The state's role in water quality: Soil and water conservation district commissioners and the agricultural status quo. *Human Organization* **2013**, *72*, 44-54.
19. Cook, C. Governing jurisdictional fragmentation: Tracing patterns of water governance in Ontario, Canada. *Geoforum* **2014**, *56*, 192-200.
20. Crabbé, A. *Analysis of the effectiveness of water policy in Flanders (in dutch)*; Flemish Environmental Agency: 2017.
21. Crabtree, B.; Kelly, S.; Green, H.; Squibbs, G.; Mitchell, G. Water Framework Directive catchment planning: A case study apportioning loads and assessing environmental benefits of programme of measures. *Water Science & Technology* **2009**, *59*, 10.
22. Da Silva, P.A.; Rocha, J.S.; Antunes, M.P.; Santos, R.F.; Borrego, D. In *Sustainable river basin management: A dynamic model c3 - proceedings of the conference on river basin management - progress towards implementation of the European Water Framework Directive*, 2005; pp 151-161.
23. deLeon. The missing link revisited: Contemporary implementation research. *Policy Studies Review* **1999**, *16*, 28.

24. Dieperink, C.; Raadgever, G.T.; Driessen, P.P.J.; Smit, A.H.; Van Rijswijk, H.F.M.W. Ecological ambitions and complications in the regional implementation of the Water Framework Directive in the Netherlands. *Water Policy* **2012**, *14*, 14.
25. Drazkiewicz, A.; Challies, E.; Newig, J. Public participation and local environmental planning: Testing factors influencing decision quality and implementation in four case studies from Germany. *Land Use Policy* **2015**, *46*, 211-222.
26. Duncan, R. Converting community knowledge into catchment nutrient limits: A constructivist analysis of a New Zealand collaborative approach to water management. *Nature and Culture* **2013**, *8*, 205-225.
27. EC. *Commission notice on access to justice in environmental matters*; European Commission: Brussels, 2017; p 65.
28. ECJ. *Commission v France* c266/99. European Court of Justice Luxembourg: 2001.
29. ECJ. *Dieter Janecek v Freistaat Bayern* c-237/07. European Court of Justice Luxembourg: 2008.
30. ECJ. *Bund für Umwelt und Naturschutz Deutschland v. Bundesrepublik Deutschland*; case c-461/13. European Court of Justice Luxembourg: 2015.
31. Elofsson, K. Delegation of decision-rights for wetlands. *Environmental and Resource Economics* **2011**, *50*, 285-303.
32. Freriks, A.; Keessen, A.M.; Korsse, D.; Van Rijswijk, H.F.M.W.; Bastmeijer, K. *As far as the own instruments reach: A study on the position of the province of North-Brabant and the North-Brabant water authorities in the realisation of the Water Framework Objectives, with special attention to the new Dutch Environmental Act (in dutch)*; Utrecht University, University of Tilburg, The Netherlands: Utrecht, 2016; p 94.
33. Gani, A.; Scrimgeour, F. Modeling governance and water pollution using the institutional ecological economic framework. *Economic Modelling* **2014**, *42*, 363-372.
34. Grant, W.; Matthews, D.; Newell, P. *Water Policy*. In *The effectiveness of European Union Environmental Policy*, Ed. Palgrave Macmillan UK: 2000.
35. Gu, B.; Fan, L.; Ying, Z.; Xu, Q.; Luo, W.; Ge, Y.; Scott, S.; Chang, J. Socioeconomic constraints on the technological choices in rural sewage treatment. *Environmental Science and Pollution Research* **2016**, *23*, 20360-20367.
36. Guo, Q.; Wu, J.; Xiao, L. Promoting ecosystem services through ecological planning in the Xianghe segment of China's grand canal. *International Journal of Sustainable Development and World Ecology* **2016**, *23*, 365-371.
37. Hagemann, N.; Blumensaat, F.; Tavares Wahren, F.; Trümper, J.; Burmeister, C.; Moynihan, R.; Scheifhacken, N. The long road to improving the water quality of the Western Bug River (Ukraine) - a multi-scale analysis. *Journal of Hydrology* **2014**, *519*, 2436-2447.
38. Hammer, M.; Balfors, B.; Mörtberg, U.; Petersson, M.; Quin, A. Governance of water resources in the phase of change: A case study of the implementation of the EU Water Framework Directive in Sweden. *Ambio: A Journal of the Human Environment* **2011**, *40*, 11.
39. Harmsworth, G.; Awatere, S.; Robb, M. Indigenous māori values and perspectives to inform freshwater management in Aotearoa-New Zealand. *Ecology and Society* **2016**, *21*.
40. Hering, D.; Borja, A.; Carstensen, J.; Carvalho, L.; Elliott, M.; Feld, C.; Heiskanen, A.; Johnson, R.; Moe, J.; Pont, D., *et al.* The European Water Framework Directive at the age of 10: A critical review of the achievements with recommendations for the future. *Science of the Total Environment* **2010**, *408*, 13.
41. Hong, C.Y.; Chung, E.S. Temporal variations of citizens' demands on flood damage mitigation, streamflow quantity and quality in the Korean urban watershed. *Sustainability (Switzerland)* **2016**, *8*.
42. Howarth, W. Water pollution and water quality - shifting regulatory paradigms. In *Handbook on water law and policy*, Howarth, W., Rieu-Clarke, A., Allen, A., Hendry, S, Ed. Routledge: 2017.

43. Huber-Stearns, H.R.; Cheng, A.S. The evolving role of government in the adaptive governance of freshwater social-ecological systems in the Western US. *Environmental Science and Policy* **2017**, *77*, 40-48.
44. Hüesker, F.; Moss, T. The politics of multi-scalar action in river basin management: Implementing the EU Water Framework Directive (WFD). *Land Use Policy* **2015**, *42*, 10.
45. Huitema, D.; Mostert, E.; Egas, W.; Moellenkamp, S.; Pahl-Wostl, C.; Yalcin, R. Adaptive water governance: Assessing the institutional prescriptions of adaptive (co-)management from a governance perspective and defining a research agenda. *Ecology and Society* **2009**, *14*, 19.
46. Hummel, H.G.K.; Van Houcke, J.; Nadolski, R.J.; Van Der Hiele, T.; Kurvers, H.; Löhr, A. Scripted collaboration in serious gaming for complex learning: Effects of multiple perspectives when acquiring water management skills. *British Journal of Educational Technology* **2011**, *42*, 1029-1041.
47. Jin, X.; Lu, S.; Hu, X.; Jiang, X.; Wu, F. Control concept and countermeasures for shallow lakes' eutrophication in China. *Frontiers of Environmental Science and Engineering in China* **2008**, *2*, 257-266.
48. Jonsson, A. Public participation in water resources management: Stakeholder voices on degree, scale, potential, and methods in future water management. *Ambio: A Journal of the Human Environment* **2005**, *34*, 6.
49. Kastens, B.; Newig, J. The Water Framework Directive and agricultural nitrate pollution: Will great expectations in Brussels be dashed in Lower Saxony? *European Environmental* **2007**, *17*, 16.
50. Kastens, B.; Newig, J. Will participation foster the successful implementation of the Water Framework Directive? The case of agricultural groundwater in Northwest Germany. *Local Environment* **2008**, *13*, 15.
51. Keessen, A.M.; Van Kempen, J.J.H.; Van Rijswijk, H.F.M.W.; Robbe, J.; Backes, Ch.W. European river basin districts: Are they swimming in the same implementation pool? *Journal of Environmental Law* **2010**.
52. Knieper, C.; Pahl-Wostl, C. A comparative analysis of water governance, water management, and environmental performance in river basins. *Water Resources Management* **2016**, *30*, 2161-2177.
53. Kochskämper, E.; Challies, E.; Newig, J.; Jager, N.W. Participation for effective environmental governance? Evidence from Water Framework Directive implementation in Germany, Spain and the United Kingdom. *Journal of Environmental Management* **2016**, *181*, 737-748.
54. Kolinjivadi, V.; Gamboa, G.; Adamowski, J.; Kosoy, N. Capabilities as justice: Analysing the acceptability of payments for ecosystem services (pes) through 'social multi-criteria evaluation'. *Ecological Economics* **2015**, *118*, 99-113.
55. Kotze, D.; Silima, V. Wetland cultivation: Reconciling the conflicting needs of the rural poor and society at large through wise wetland use. *International Journal of Ecology and Environmental Sciences* **2003**, *29*, 65-71.
56. Lah, T.J.; Park, Y.; Cho, Y.J. The four major rivers restoration project of South Korea: An assessment of its process, program, and political dimensions. *Journal of Environment and Development* **2015**, *24*, 375-394.
57. Le Bourhis, J.P. The politics of green knowledge: A comparative study of support for and resistance to sustainability and environmental indicators. *Journal of Comparative Policy Analysis* **2016**, *18*, 16.
58. Lee, M. Law and governance of water protection policy. In *EU environmental governance*, Scott, J., Ed. Oxford University Press: Oxford, United Kingdom, 2009.
59. Leidel, M.; Hagemann, N.; Seegert, J.; Weigelt, C.; Zakorchevna, N.; Blumensaat, F. Supporting decisions in water management by exploring information and capacity gaps:

- Experiences from an iworm study in the Western Bug River Basin, Ukraine. *Environmental Earth Sciences* **2014**, 72, 4771-4786.
60. Lukacs, H.; Ardoin, N.M.; Grubert, E. Beyond formal groups: Neighboring acts and watershed protection in Appalachia. *International Journal of the Commons* **2016**, 10, 878-901.
  61. Mauerhofer, V.; Hubacek, K.; Coleby, A. From polluter pays to provider gets: Distribution of rights and costs under payments for ecosystem services. *Ecology and Society* **2013**, 18.
  62. McLaughlin, C.; Krantzberg, G. An appraisal of policy implementation deficits in the Great Lakes. *Journal of Great Lakes Research* **2011**, 37, 390-396.
  63. Metcalf, S.J.; Dambacher, J.M.; Rogers, P.; Loneragan, N.; Gaughan, D.J. Identifying key dynamics and ideal governance structures for successful ecological management. *Environmental Science and Policy* **2014**, 37, 34-49.
  64. Metz, F.; Ingold, K. Politics of the precautionary principle: Assessing actors' preferences in water protection policy. *Policy Sciences* **2017**, 1-23.
  65. Mihók, B.; Biró, M.; Molnár, Z.; Kovács, E.; Bölöni, J.; Erős, T.; Standovár, T.; Török, P.; Csorba, G.; Margóczy, K., *et al.* Biodiversity on the waves of history: Conservation in a changing social and institutional environment in Hungary, a post-soviet EU Member State. *Biological Conservation* **2017**, 211, 67-75.
  66. Moss, T. Spatial fit, from panacea to practice: Implementing the EU Water Framework Directive. *Ecology and Society* **2012**, 17, 12.
  67. Newig, J.; Koontz, T.M. Multi-level governance, policy implementation and participation: The EU's mandated participatory planning approach to implementing environmental policy. *Journal of European Public Policy* **2014**, 21, 248-267.
  68. Newig, J.; Fritsch, O. Environmental governance: Participatory, multi-level – and effective? *Environmental Policy and Governance* **2009**, 19, 18.
  69. Newig, J.; Gaube, V.; Berkhoff, K.; Kaldrack, K.; Kastens, B.; Lutz, J.; Schlußmeier, B.; Adensam, H.; Haberl, H. The role of formalisation, participation and context in the success of public involvement mechanisms in resource management. *Systemic Practice and Action Research* **2008**, 21, 19.
  70. Newson, M. Rivers in trust: Stakeholders and delivery of the EU Water Framework Directive. *Water Management* **2011**, 164, 8.
  71. Norman, L.M.; Guertin, D.P.; Feller, M. A coupled model approach to reduce nonpoint-source pollution resulting from predicted urban growth: A case study in the Ambos Nogales Watershed. *Urban Geography* **2008**, 29, 496-516.
  72. Ostrom, E.; Janssen, M.; Anderies, J. Going beyond panaceas. *Proceedings of the National Academy of Sciences* **2007**, 104, 3.
  73. Pahl-Wostl, C.; Lebel, L.; Knieper, C.; Nikitina, E. From applying panaceas to mastering complexity: Towards adaptive water governance in river basins. *Environmental Science & Policy* **2012**, 23, 11.
  74. Pahl-Wostl, C.; Jeffrey, P.; Sendzimir, J. Adaptive and integrated management of water resources. In *Water resources planning and management*, Cambridge University Press: 2011; pp 292-310.
  75. Parker, J.S. Integrating culture and community into environmental policy: Community tradition and farm size in conservation decision making. *Agriculture and Human Values* **2013**, 30, 159-178.
  76. Parsons, M.; Thoms, M.C.; Norris, R.H. Development of a standardised approach to river habitat assessment in Australia. *Environmental Monitoring and Assessment* **2004**, 98, 109-130.
  77. Pereira, Â.G.; Quintana, S.C. 3 pillars and 1 beam: Quality of river basin governance processes. *Ecological Economics* **2009**, 68, 940-954.



78. Plambeck, E. Paradoxes of the EU regulatory framework in water management: Developing an assessment framework to put the governance approach to the test. *The Journal of Water Law* **2015**, 24, 9.
79. Plant, R.; Walker, J.; Rayburg, S.; Gothe, J.; Leung, T. The wild life of pesticides: Urban agriculture, institutional responsibility, and the future of biodiversity in Sydney's Hawkesbury-Nepean river. *Australian Geographer* **2012**, 43, 75-91.
80. Probohudono, A.N.; Muqoffa, M.; Wardoyo, W.W.; Wibowo, A. Dimensions of Javanese culture as social control in water conflict (story from Indonesia). *Taiwan Water Conservancy* **2017**, 65, 80-94.
81. Raad van State. Stichting Natuur en Milieu and others versus Provinces of South Holland and Groningen, the Netherlands, c-165 to c-176/09. In *Raad van State*, Raad van State, The Netherlands: 2011.
82. Raadgever, G.T.; Dieperink, C.; Driessen, P.P.J.; Smit, A.A.H.; Van Rijswijk, H.F.M.W. Uncertainty management strategies: Lessons from the regional implementation of the Water Framework Directive in the Netherlands. *Environmental Science & Policy* **2011**, 14, 12.
83. Rahaman, M.; Varis, O.; Kajander, T. EU Water Framework Directive vs. Integrated water resources management: The seven mismatches. *Water Resources Development* **2004**, 20, 11.
84. Reeling, C.J.; Gramig, B.M. A novel framework for analysis of cross-media environmental effects from agricultural conservation practices. *Agriculture, Ecosystems and Environment* **2012**, 146, 44-51.
85. Reinhard, S.; Linderhof, V.; Polman, N. Scale-sensitive evaluation: The contribution of the EU rural development programme to European water quality ambitions. In *Scale-sensitive governance of the environment*, Wiley Blackwell: 2014; pp 263-282.
86. Richter, S.; Völker, J.; Borchardt, D.; Mohaupt, V. The Water Framework Directive as an approach for integrated water resources management: Results from the experiences in Germany on implementation, and future perspectives. *Environmental Earth Sciences* **2013**, 69, 10.
87. Rissman, A.R.; Kohl, P.A.; Wardropper, C.B. Public support for carrot, stick, and no-government water quality policies. *Environmental Science and Policy* **2017**, 76, 82-89.
88. Roggero, M. Shifting troubles: Decision-making versus implementation in participatory watershed governance. *Environmental Policy and Governance* **2013**, 23, 12.
89. Ross, A.; Connell, D. The evolution and performance of river basin management in the Murray-Darling Basin. *Ecology and Society* **2016**, 21.
90. Rutt, R.L.; Bluwstein, J. Quests for justice and mechanisms of suppression in Flint, Michigan. *Environmental Justice* **2017**, 10, 27-35.
91. Schindler, D.W. Geoscience of climate and energy 12. Water quality issues in the oil sands region of the Lower Athabasca River, Alberta. *Geoscience Canada* **2013**, 40, 202-214.
92. Schmidt, K.R.; der Beek, T.; Dai, X.; Dong, B.; Dopp, E.; Eichinger, F.; Hammers-Wirtz, M.; Haußmann, R.; Holbach, A.; Hollert, H., et al. Since 2015 the Sinogerman research project sign supports water quality improvement in the Taihu Region, China. *Environmental Sciences Europe* **2016**, 28.
93. Scholz, J.T.; Stiftel, B. *Adaptive governance and water conflict: New institutions for collaborative planning*. Resources for the Future: 2005; p 1-274.
94. Scott, T. Does collaboration make any difference? Linking collaborative governance to environmental outcomes. *Journal of Policy Analysis and Management* **2015**, 34, 537-566.
95. Scott, T.A. Is collaboration a good investment? Modeling the link between funds given to collaborative watershed councils and water quality. *Journal of Public Administration Research and Theory* **2016**, 26, 769-786.
96. Scott, J.; Trubek, D. Mind the gap: Law and new approaches to governance in the European Union. *European Law Journal* **2002**, 8, 18.

97. Smith, L.E.D.; Porter, K.S. Management of catchments for the protection of water resources: Drawing on the New York City watershed experience. *Regional Environmental Change* **2010**, *10*, 311-326.
98. Somanathan, E. Effects of information on environmental quality in developing countries. *Review of Environmental Economics and Policy* **2010**, *4*, 275-292.
99. Steiger-Meister, K.; Becker, D.R. Using policy to promote participatory planning: An examination of Minnesota's Lake Improvement Districts from the citizen perspective. *Journal of Environmental Planning and Management* **2012**, *55*, 599-615.
100. Storey, R.G.; Wright-Stow, A.; Kin, E.; Davies-Colley, R.J.; Stott, R. Volunteer stream monitoring: Do the data quality and monitoring experience support increased community involvement in freshwater decision making? *Ecology and Society* **2016**, *21*.
101. Stuart, D.; Gillon, S. Scaling up to address new challenges to conservation on us farmland. *Land Use Policy* **2013**, *31*, 223-236.
102. Tan, X. Environment, governance and GDP: Discovering their connections. *International Journal of Sustainable Development* **2006**, *9*, 311-335.
103. Taylor, K.; Short, A. Integrating scientific knowledge into large-scale restoration programs: The CALFED Bay-Delta program experience. *Environmental Science & Policy* **2009**, *12*, 10.
104. Trowbridge, P.R.; Davis, J.A.; Mumley, T.; Taberski, K.; Feger, N.; Valiela, L.; Ervin, J.; Arsem, N.; Olivieri, A.; Carroll, P., *et al.* The regional monitoring program for water quality in San Francisco Bay, California, USA: Science in support of managing water quality. *Regional Studies in Marine Science* **2016**, *4*, 21-33.
105. Van der Heijden, J.; Ten Heuvelhof, E. The mechanics of virtue: Lessons on public participation from implementing the Water Framework Directive in the Netherlands. *Environmental Policy and Governance* **2012**, *22*, 12.
106. Van der Heijden, J.; Ten Heuvelhof, E.; Van de Arend, S.; Broekmans, B.; Van Bueren, E.; Hartevelde, C.; Van Ruijven, T. Contrasting stories on overcoming governance challenges: The implementation of the EU Water Framework Directive. *Local Environment* **2014**, *19*, 16.
107. Van Holten, S.; Van Rijswijk, H.F.M.W. The governance approach in European Union environmental directives and its consequences for flexibility, effectiveness and legitimacy. In *Eu environmental legislation: Legal perspectives on regulatory strategies*, Peeters, M.; Uylenburg, R., Eds. Edward Elgar Publishing: 2014; pp 13-47.
108. Van Kempen, J.J.H. Countering the obscurity of obligations in European Environmental Law, illustrated by an analysis of article 4 of the European Water Framework Directive. *Journal of Environmental Law and Practice* **2012**.
109. Van Leeuwen, K.; Sjerps, R. Istanbul: The challenges of integrated water resources management in Europe's megacity. *Environment, Development and Sustainability* **2016**, *18*, 1-17.
110. Van Meerkerk, I.; Edelenbos, J.; Klijn, E.H. Connective management and governance network performance: The mediating role of throughput legitimacy. Findings from survey research on complex water projects in the Netherlands. *Environment and Planning C: Government and Policy* **2015**, *33*, 746-764.
111. Van Rijswijk, H.F.M.W., Backes, Ch.W. Ground breaking landmark case on environmental quality standards? The consequences of the ECJ 'Weser-Judgment' (c-461/13) for water policy and law and quality standards in EU Environmental Law. *Journal for European Environmental and Planning law* **2015**, *12*, 17.
112. Van Rijswijk, H.F.M.W.; Gilissen, H.K.; Van Kempen, J.J.H. The need for international and regional transboundary cooperation in European river basin management as a result of new approaches in EC water law. *ERA Forum* **2010**, *11*.
113. Van Rijswijk, H.F.M.W. *Moving water and the law - on the distribution of water rights and water duties within river basins in European and Dutch water law*. Europa Law Publishing: Groningen, 2008.

114. Vollmer-Sanders, C.; Allman, A.; Busdeker, D.; Moody, L.B.; Stanley, W.G. Building partnerships to scale up conservation: 4r nutrient stewardship certification program in the Lake Erie Watershed. *Journal of Great Lakes Research* **2016**, *42*, 1395-1402.
115. Vörösmarty, C.J.; Pahl-Wostl, C.; Bunn, S.E.; Lawford, R. Global water, the anthropocene and the transformation of a science. *Current Opinion in Environmental Sustainability* **2013**, *5*, 539-550.
116. Wang, X.; Ongley, E.D. Transjurisdictional water pollution disputes and measures of resolution: Examples from the Yellow River Basin, China. *Water International* **2004**, *29*, 282-289.
117. Wardropper, C.B.; Chang, C.; Rissman, A.R. Fragmented water quality governance: Constraints to spatial targeting for nutrient reduction in a Midwestern USA watershed. *Landscape and Urban Planning* **2015**, *137*, 64-75.
118. Waylen, K.A.; Blackstock, K.L.; Marshall, K.B.; Dunglison, J. Participation–prescription tension in natural resource management: The case of diffuse pollution in Scottish water management. *Environmental Policy and Governance* **2015**, *25*, 14.
119. Webb, A.A.; Martin, P.V. Potential of a payments for ecosystem services scheme to improve the quality of water entering the Sydney Catchments. *Water Policy* **2016**, *18*, 91-110.
120. Weible, C.M.; Sabatier, P.A. Coalitions, science, and belief change: Comparing adversarial and collaborative policy subsystems. *Policy Studies Journal* **2009**, *37*, 195-212.
121. Wright, I.A.; Belmer, N.; Davies, P.J. Coal mine water pollution and ecological impairment of one of Australia’s most ‘protected’ high conservation-value rivers. *Water, Air, and Soil Pollution* **2017**, 228.
122. Yates, A.G.; Bailey, R.C.; Schwindt, J.A. Effectiveness of best management practices in improving stream ecosystem quality. *Hydrobiologia* **2007**, *583*, 331-344.
123. Zingraff-Hamed, A.; Greulich, S.; Wantzen, K.; Pauleit, S. Societal drivers of European water governance: A comparison of urban river restoration practices in France and Germany. *Water* **2017**, *9*, 206.
